# Supplementary material for: Evaluating meaningful levels of financial toxicity in gynecologic cancers
Source: HighWire-hosted journal article supplement (doi:10.1136/ijgc-2021-002475), 2021-04-15
Supplement: ijgc-2021-002475supp001_data_supplement.pdf [file ijgc-2021-002475supp001_data_supplement.pdf]

# INTERNATIONAL JOURNAL OF GYNECOLOGICAL CANCER

## Evaluating Meaningful Levels of Financial Toxicity in Gynecologic Cancers

Katharine M. Esselen, Annika Gompers, Michele R. Hacker, Sara Boubberhan, Meghan Shea, Sarah S. Summerlin, Lindsay R. Rucker, Warner K. Huh, Maria Pisu, Margaret I. Liang

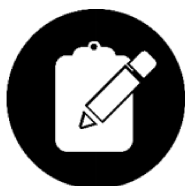

Comprehensive Score for Financial Toxicity (COST) measures economic burden among patients with cancer<sup>1</sup>

0 - 44 scale, lower scores indicate worse financial toxicity

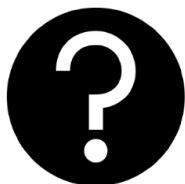

What level of financial toxicity correlates with meaningful cost-coping behaviors?

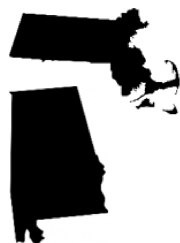

Analyzed survey data of patients with gynecologic cancer from Beth Israel Deaconess Medical Center (MA) and the University of Alabama at Birmingham (AL)

**Financial toxicity (FT) affects nearly half of patients with gynecologic cancer and is associated with cost-coping strategies**

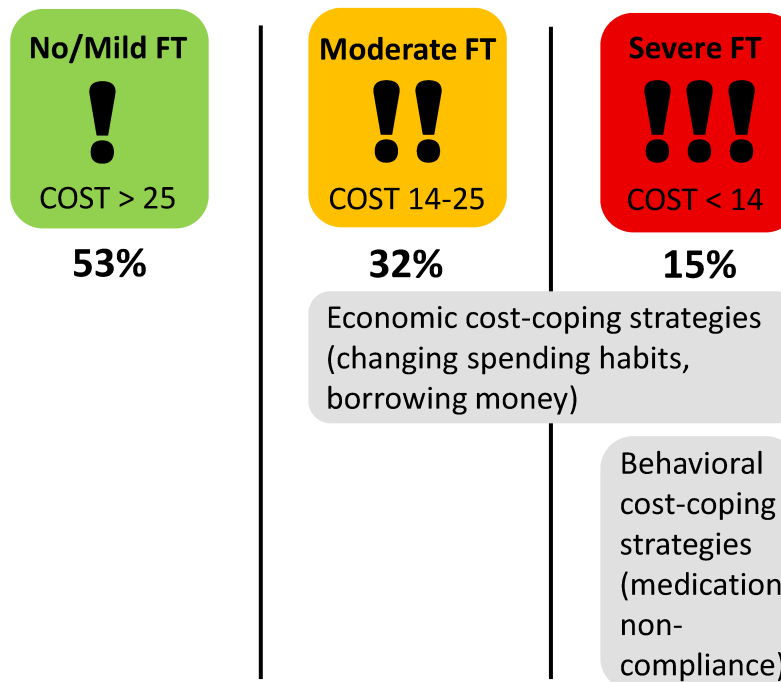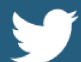

@IJGOnline

1. de Souza JA, Yap BJ, Hlubocky FJ, et al. The development of a financial toxicity patient-reported outcome in cancer: The COST measure. *Cancer* 2014;120(20):3245-53.

Copyright © 2020 BMJ Publishing Group Ltd, International Gynecologic Cancer Society, & European Society of Gynaecological Oncology. All rights reserved.
